# Supplementary material for: Water intrusion–extrusion experiments in ZIF-8: impacts of the shape and particle size on the energetic performances
Source: Royal Society of Chemistry journal article supplement (doi:10.1039/c5ra02636a), 2015-01-01
Supplement: c5ra02636a1.pdf [file c5ra02636a1.pdf]

# Water intrusion-extrusion experiments in ZIF-8: Impacts of the shape and particle size on the energetic performances

*Ismail Khay, Gérald Chaplais,\* Habiba Nouali, Claire Marichal, and Joël Patarin\**

Université de Strasbourg, Université de Haute Alsace, Equipe Matériaux à Porosité Contrôlée  
(MPC), Institut de Science des Matériaux de Mulhouse (IS2M), UMR CNRS 7361, ENSCMu,  
3 bis rue Alfred Werner, 68093 Mulhouse Cedex, France

\* To whom correspondence should be addressed.

Gérald Chaplais. Email: [gerald.chaplais@uha.fr](mailto:gerald.chaplais@uha.fr). Phone number: +33 3 89 33 68 87

Joël Patarin. Email: [joel.patarin@uha.fr](mailto:joel.patarin@uha.fr). Phone number: +33 3 89 33 68 80

# Table of contents

|                                                                                    |    |
|------------------------------------------------------------------------------------|----|
| 1. Experimental Section .....                                                      | 1  |
| 1.1. Chemical reactants and solvents .....                                         | 1  |
| 1.2. Synthesis of ZIF-8 nanospheres (NS-ZIF-8) .....                               | 1  |
| 1.3. Synthesis of rhombic dodecahedron ZIF-8 nanoparticles (NRD-ZIF-8).....        | 1  |
| 1.4. Synthesis of ZIF-8 nanocubes (NC-ZIF-8).....                                  | 2  |
| 1.5. Synthesis of rhombic dodecahedron ZIF-8 microparticles (MRD-ZIF-8).....       | 2  |
| 1.6. Synthesis of ZIF-8 microcubes with truncated edges (MCTE-ZIF-8).....          | 2  |
| 2. Characterization techniques .....                                               | 4  |
| 2.1. Powder X-ray Diffraction .....                                                | 4  |
| 2.2. Scanning Electron Microscopy .....                                            | 4  |
| 2.3. Particle Size Distribution .....                                              | 4  |
| 2.4. Nitrogen Adsorption-Desorption Measurements .....                             | 4  |
| 2.5. Thermogravimetric Analyses .....                                              | 4  |
| 2.6. Water intrusion-extrusion experiments under high pressure .....               | 4  |
| 3. Particle Size Distribution.....                                                 | 6  |
| 4. Stability of ZIF-8 framework upon high pressure intrusion-extrusion of water... | 7  |
| 4.1. X-Ray Diffraction .....                                                       | 7  |
| 4.2. Scanning Electron Microscopy .....                                            | 8  |
| 4.3. N <sub>2</sub> Adsorption-Desorption Measurements .....                       | 10 |
| 4.4. Thermogravimetric Analyses .....                                              | 12 |
| 5. References .....                                                                | 13 |

## 1. Experimental Section

### 1.1. Chemical reactants and solvents

The following chemicals were used as received without further purification: zinc nitrate hexahydrate ( $\text{Zn}(\text{NO}_3)_2 \cdot 6\text{H}_2\text{O}$ , 99.9%, Sigma-Aldrich), 2-methylimidazole (HMeIm, 99%, abcr), hexadecyltrimethyl ammonium bromide (CTAB, 98%, Fluka), *N,N*-dimethylformamide (DMF, 99.8%, Sigma-Aldrich), ammonium hydroxide solution ( $\text{NH}_4\text{OH}$ , 33% aqueous solution, Riedel-de Haën) and methanol (MeOH, 99.8%, Sigma-Aldrich).

### 1.2. Synthesis of ZIF-8 nanospheres (NS-ZIF-8)

The *ZIF-8 nanospheres* were synthesized according to a procedure similar to that described in literature.<sup>1</sup> 44.3 g (539.4 mmol) of HMeIm and 1.6 g (5.4 mmol) of  $\text{Zn}(\text{NO}_3)_2 \cdot 6\text{H}_2\text{O}$  were dissolved in 150 and 66.7 g of deionized water, respectively. Afterwards, zinc nitrate and HMeIm solutions were quickly mixed together under stirring. The final synthesis solution had the following molar composition 1 Zn : 100 HMeIm : 2233  $\text{H}_2\text{O}$ . The mixture was then stirred at room temperature for 24 h. The product was collected by centrifugation and washed 6 times with MeOH. The resulting ZIF-8 sample was dried at room temperature overnight.

### 1.3. Synthesis of rhombic dodecahedron ZIF-8 nanoparticles (NRD-ZIF-8)

The *rhombic dodecahedron ZIF-8 nanoparticles* were synthesized according to a procedure similar to that described in reference.<sup>2</sup> 2.659 g (8.937 mmol) of  $\text{Zn}(\text{NO}_3)_2 \cdot 6\text{H}_2\text{O}$  were first dissolved in 121.35 g of DMF and then mixed with 1.996 g (5.474 mmol) of CTAB under stirring for 5 min at room temperature. Then, 4.508 g (54.902 mmol) of HMeIm were dissolved in 121 g of DMF. The zinc nitrate and 2-methylimidazole solutions were mixed and stirred for 5 min at room temperature. The final molar composition was 1 Zn : 6.14 HMeIm : 0.61 CTAB : 371 DMF : 18.4  $\text{H}_2\text{O}$ . The resulting synthesis suspension was transferred into Teflon®-lined autoclaves for hydro-solvothermal treatment at 120 °C for 6 h. Then, the particles were collected by centrifugation, washed 6 times with MeOH at room temperature. The resulting ZIF-8 sample was dried at room temperature overnight.

#### **1.4. Synthesis of ZIF-8 nanocubes (NC-ZIF-8)**

The *ZIF-8 nanocubes* were synthesized according to a procedure previously published.<sup>2</sup> 0.907 g (3.02 mmol) of  $\text{Zn}(\text{NO}_3)_2 \cdot 6\text{H}_2\text{O}$  was first dissolved in 91.5 g of deionized water and mixed with 0.0562 g (0.154 mmol) of CTAB under stirring for 5 min at room temperature. Then, 13.48 g (164.25 mmol) of HMeIm were dissolved in 150 g of deionized water. After that, the zinc nitrate and 2-methylimidazole solutions were mixed and stirred for 5 min at room temperature. The final molar composition was 1 Zn : 54.3 HMeIm : 0.05 CTAB : 4437  $\text{H}_2\text{O}$ . The resulting synthesis solution was transferred into Teflon®-lined autoclaves for hydrothermal synthesis at 120 °C for 6 h. After synthesis, the particles were collected by centrifugation, washed 3 times with MeOH at room temperature, then 3 times with DMF at 120 °C, and finally again 3 times with MeOH at room temperature. The resulting ZIF-8 sample was dried at room temperature overnight.

#### **1.5. Synthesis of rhombic dodecahedron ZIF-8 microparticles (MRD-ZIF-8)**

The *rhombic dodecahedron ZIF-8 microparticles* were synthesized according to a procedure similar to that described in literature.<sup>3</sup> 0.87 g (2.925 mmol) of  $\text{Zn}(\text{NO}_3)_2 \cdot 6\text{H}_2\text{O}$  was first dissolved in 91.5 g of deionized water. Then, 13.62 g (165.875 mmol) of HMeIm were dissolved in 30 g of deionized water. After that, the zinc nitrate and 2-methylimidazole solutions were mixed and stirred for 5 min at room temperature. The final mixture had the following molar composition 1 Zn : 56.72 HMeIm : 4560  $\text{H}_2\text{O}$  and was transferred into Teflon®-lined autoclaves for hydrothermal treatment at 120 °C for 6 h. The particles were collected by centrifugation and washed 6 times with MeOH at room temperature. The resulting ZIF-8 sample was dried at room temperature overnight.

#### **1.6. Synthesis of ZIF-8 microcubes with truncated edges (MCTE-ZIF-8)**

The *ZIF-8 microcubes with truncated edges* were synthesized according to the procedure published by He *et al.*<sup>4</sup> 0.99 g of HMeIm and 1.79 g of  $\text{Zn}(\text{NO}_3)_2 \cdot 6\text{H}_2\text{O}$  were dissolved in 9.93 g of  $\text{NH}_4\text{OH}$  solution and in 9.72 g of deionized water, respectively. After that, the two solutions were mixed together under stirring. The final synthesis solution had the following molar composition 1 Zn : 2 HMeIm : 32  $\text{NH}_4\text{OH}$  : 157  $\text{H}_2\text{O}$ . The solution which quickly turned into milk-like suspension was stirred for 10 min at room temperature to complete the crystallization. The product was

collected by centrifugation and washed with deionized water four times until the final product reaches pH value of 7, then 4 more washings with MeOH took place. The resulting ZIF-8 sample was dried at room temperature overnight.

## **2. Characterization techniques**

### **2.1. Powder X-ray Diffraction**

X-ray diffraction patterns of the different samples were recorded in a Debye-Scherrer geometry on a STOE STADI-P diffractometer equipped with a curved germanium (111), primary monochromator, and a linear position-sensitive detector ( $6^\circ$  in  $2\theta$ ) using Cu  $K\alpha_1$  radiation ( $\lambda = 1.5406 \text{ \AA}$ ). Measurements were achieved for  $2\theta$  angle values in the 5-50 range, step  $0.04^\circ$  in  $2\theta$ .

### **2.2. Scanning Electron Microscopy**

The size and the shape of the crystals were determined by scanning electron microscopy (SEM) using a Philips XL 30 FEG microscope.

### **2.3. Particle Size Distribution**

The particle size distribution of ZIF-8 crystals was determined by manual measurements from the SEM micrographs.

### **2.4. Nitrogen Adsorption-Desorption Measurements**

Nitrogen adsorption-desorption isotherms were performed at 77 K using a Micromeritics ASAP 2420 apparatus. Prior to the adsorption measurements, the samples were outgassed at  $200^\circ\text{C}$  overnight under vacuum. The specific surface areas ( $S_{BET}$  and  $S_L$ ) and microporous volume ( $V_\mu$ ), before and after water intrusion-extrusion experiments, were calculated using the BET, in the  $0.0003 \leq p/p^\circ \leq 0.006$  range, Langmuir (in the same range as BET surface) and  $t$ -plot methods, respectively.

### **2.5. Thermogravimetric Analyses**

Thermogravimetric (TG) analyses were carried out on a TG Mettler Toledo STARE apparatus, under air flow, with a heating rate of  $2^\circ\text{C min}^{-1}$  from  $30$  to  $900^\circ\text{C}$ .

### **2.6. Water intrusion-extrusion experiments under high pressure**

The intrusion-extrusion experiments of water in ZIF-8 samples were performed at room temperature using a modified mercury porosimeter (Micromeritics Model Autopore IV) as described in our previous works.<sup>5</sup> ZIF-8 (*i.e.*, NRD-ZIF-8, NS-ZIF-8, NC-ZIF-8, MRD-ZIF-8, and MCTE-ZIF-8) powders were directly introduced in the cell. The values of the intrusion ( $P_{int}$ ) and

extrusion ( $P_{ext}$ ) pressures correspond to that of the half volume total variation. The start intrusion pressure ( $P_{1\ int}$ ) corresponds to the start of intrusion step and the final extrusion pressure ( $P_{2\ ext}$ ) corresponds to the end of extrusion step when the water molecules are completely expelled from the porosity. Pressure is expressed in megapascals (MPa) and volume variation in milliliters per gram of sample ( $\text{mL g}^{-1}$ ).

### 3. Particle Size Distribution

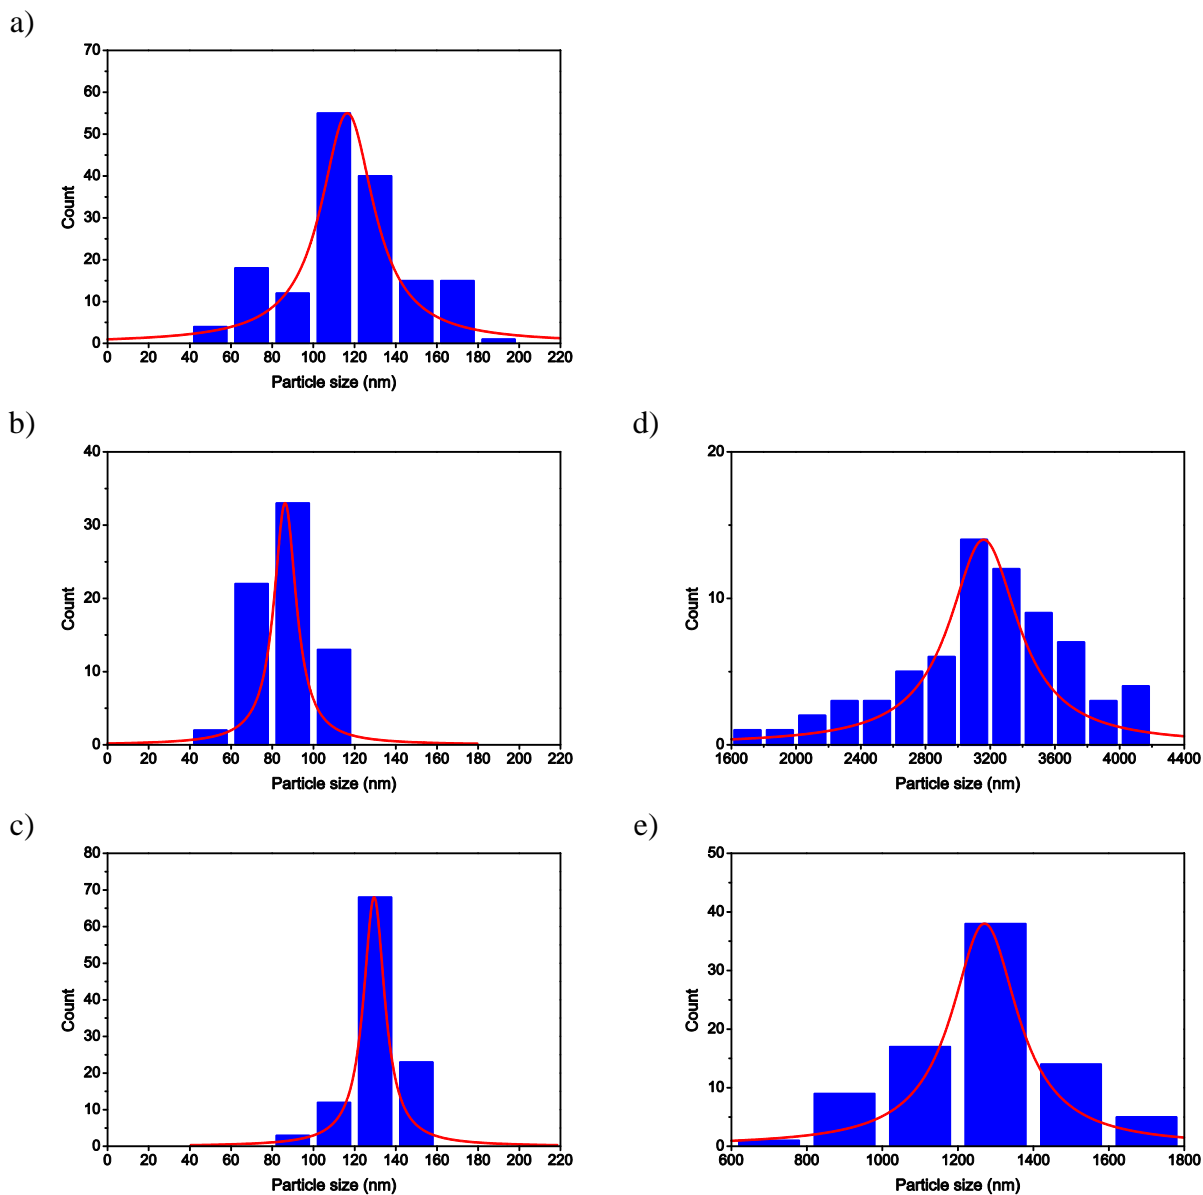

**Fig. S1** Histograms of particle size distribution (PSD) for (a) nanometer-sized spherical crystals (NS-ZIF-8 sample), (b) nanometer-sized rhombic dodecahedron crystals (NRD-ZIF-8 sample), (c) nanometer-sized cubic crystals (NC-ZIF-8 sample), (d) micrometer-sized rhombic dodecahedron crystals (MRD-ZIF-8 sample) and (e) micrometer-sized cubic crystals with truncated edges (MCTE-ZIF-8 sample). Additional Lorentzian fit is also given for each PSD.



## 4. Stability of ZIF-8 framework upon high pressure intrusion-extrusion of water

### 4.1. X-Ray Diffraction

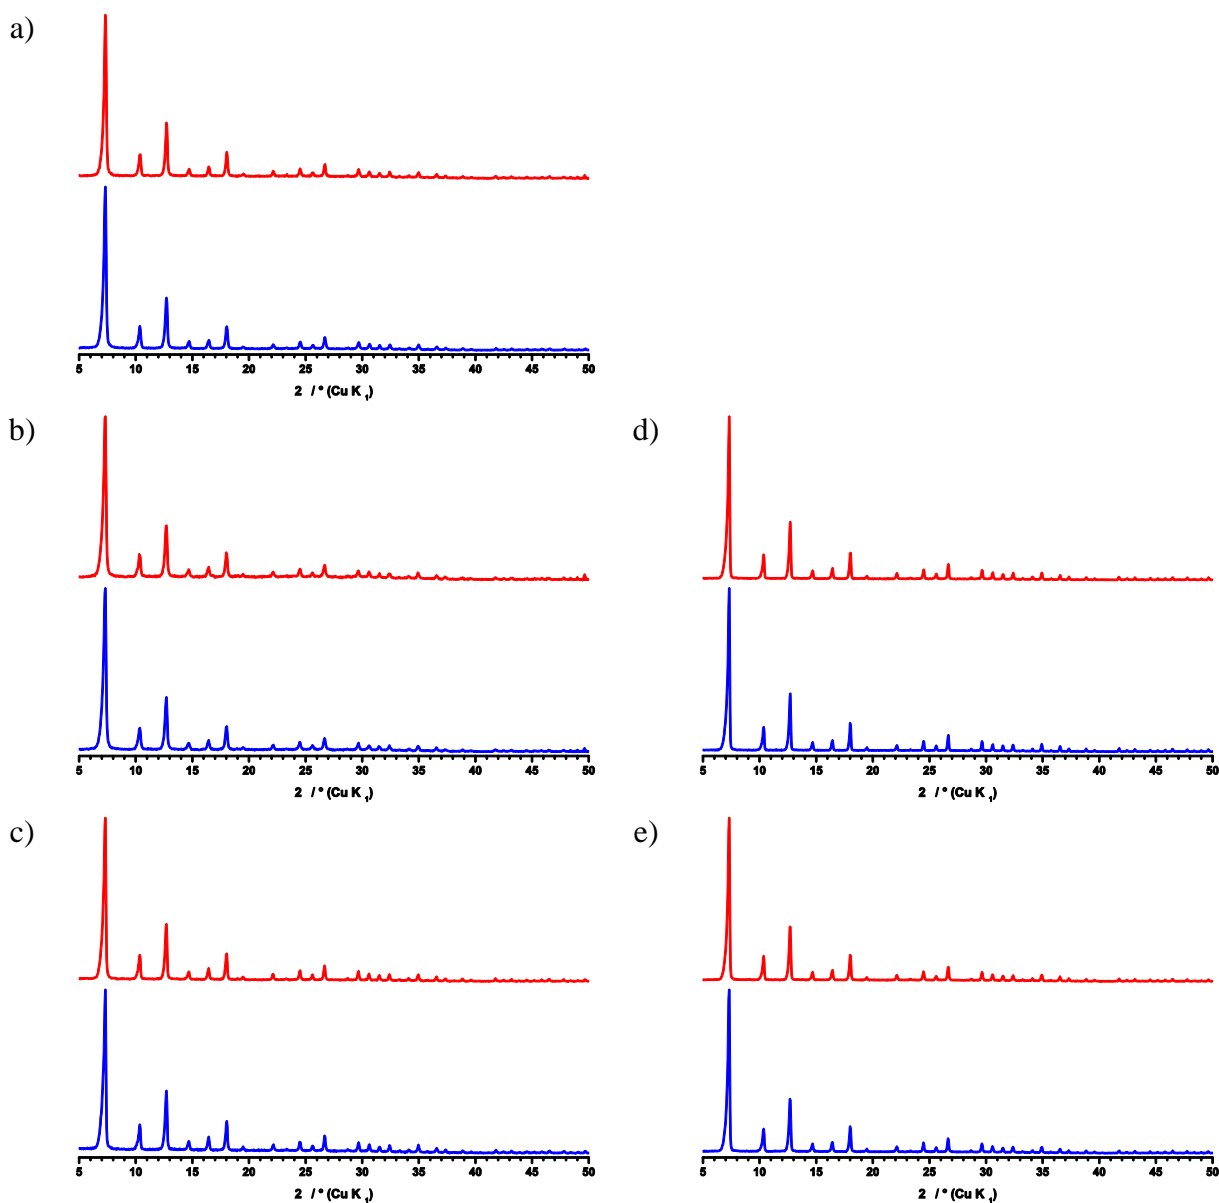

**Fig. S2** X-ray diffraction patterns before (blue) and after (red) three water intrusion-extrusion cycles of (a) nanometer-sized spherical crystals (NS-ZIF-8 sample), (b) nanometer-sized rhombic dodecahedron crystals (NRD-ZIF-8 sample), (c) nanometer-sized cubic crystals (NC-ZIF-8 sample), (d) micrometer-sized rhombic dodecahedron crystals (MRD-ZIF-8 sample) and (e) micrometer-sized cubic crystals with truncated edges (MCTE-ZIF-8 sample).

4.2. Scanning Electron Microscopy

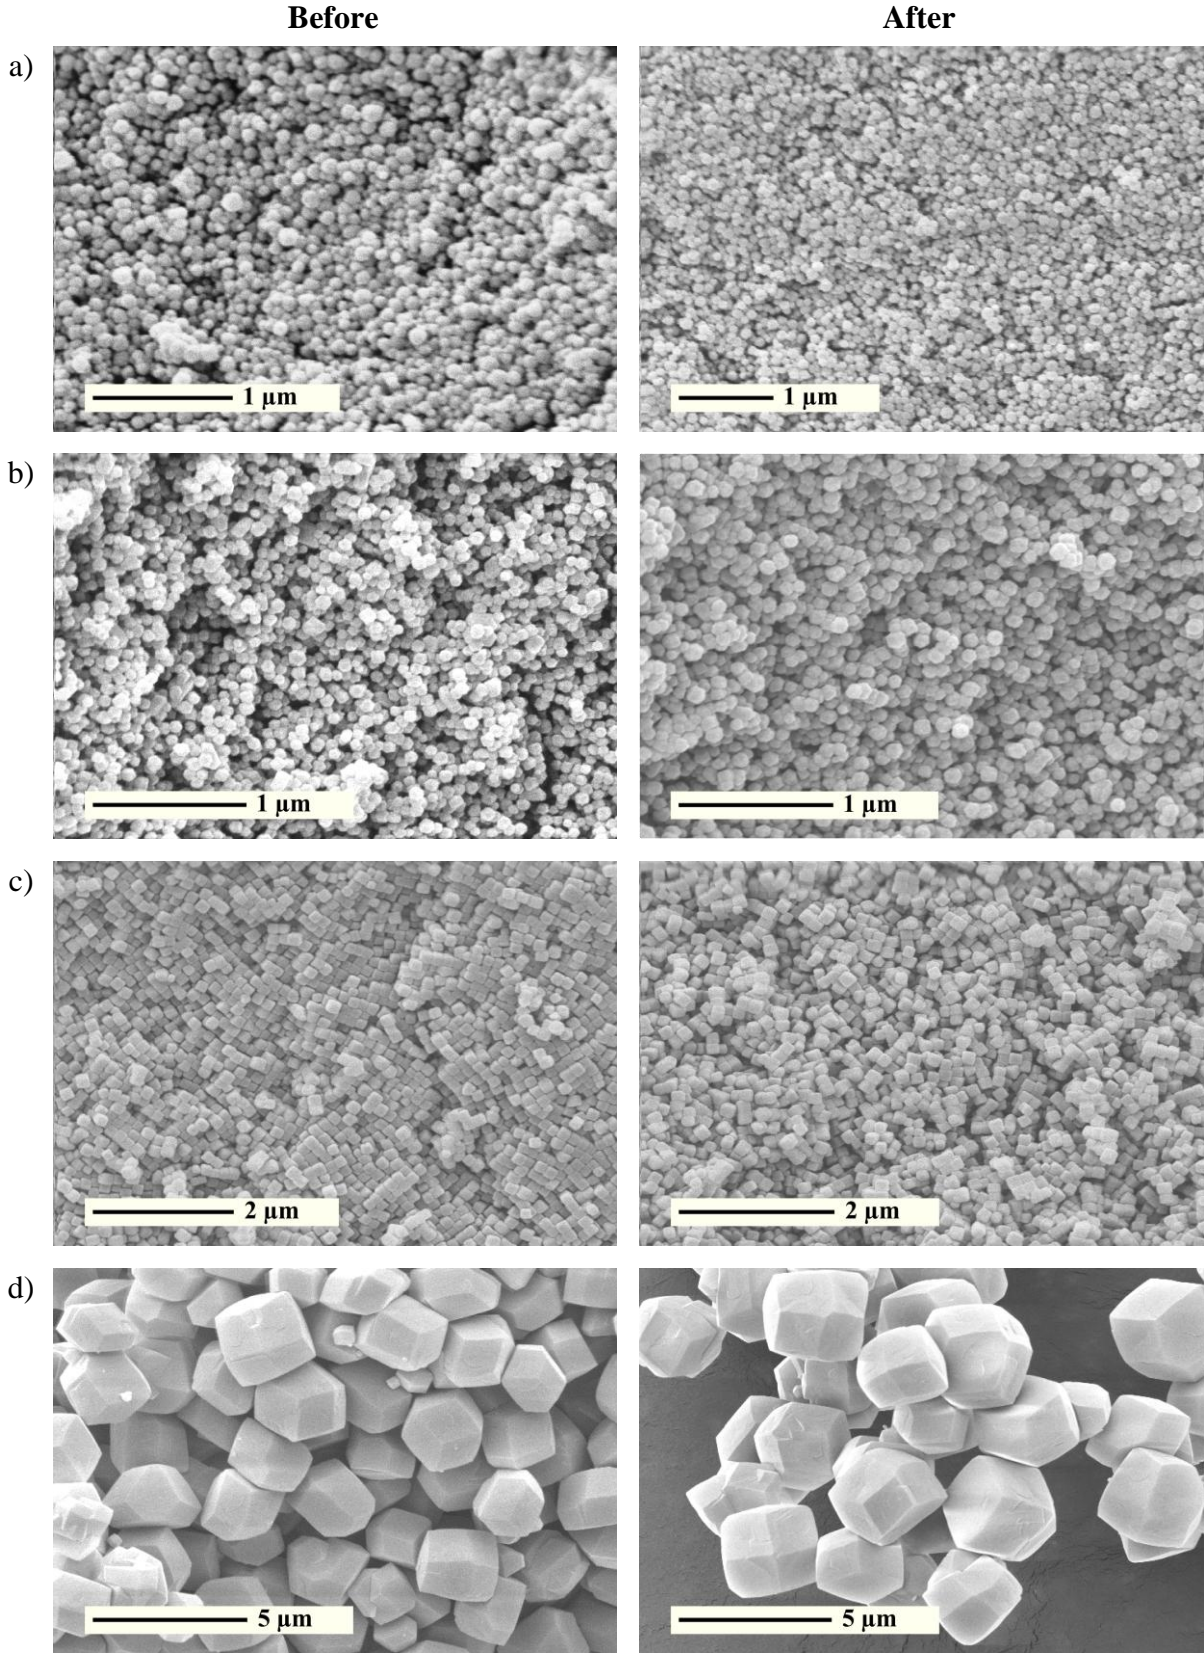

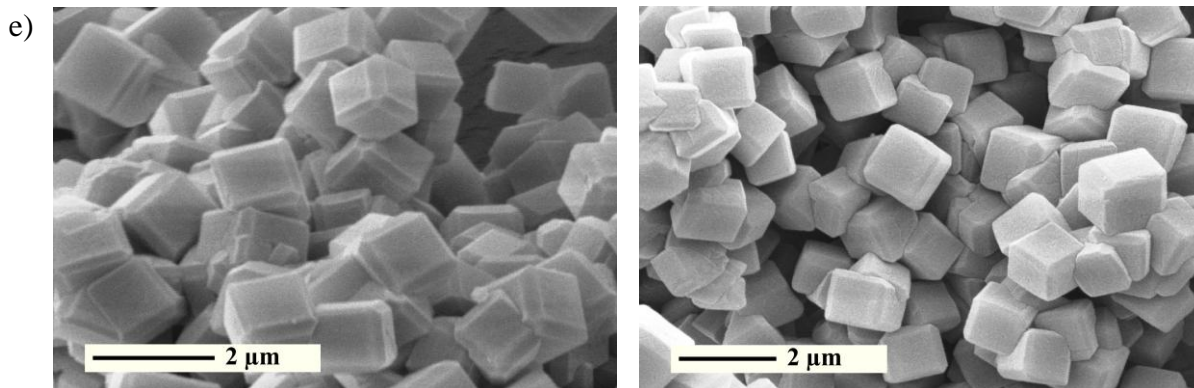

**Fig. S3** SEM micrographs before (left) and after (right) three water intrusion-extrusion cycles of (a) nanometer-sized spherical crystals (NS-ZIF-8 sample), (b) nanometer-sized rhombic dodecahedron crystals (NRD-ZIF-8 sample), (c) nanometer-sized cubic crystals (NC-ZIF-8 sample), (d) micrometer-sized rhombic dodecahedron crystals (MRD-ZIF-8 sample) and (e) micrometer-sized cubic crystals with truncated edges (MCTE-ZIF-8 sample).

### 4.3. N<sub>2</sub> Adsorption-Desorption Measurements

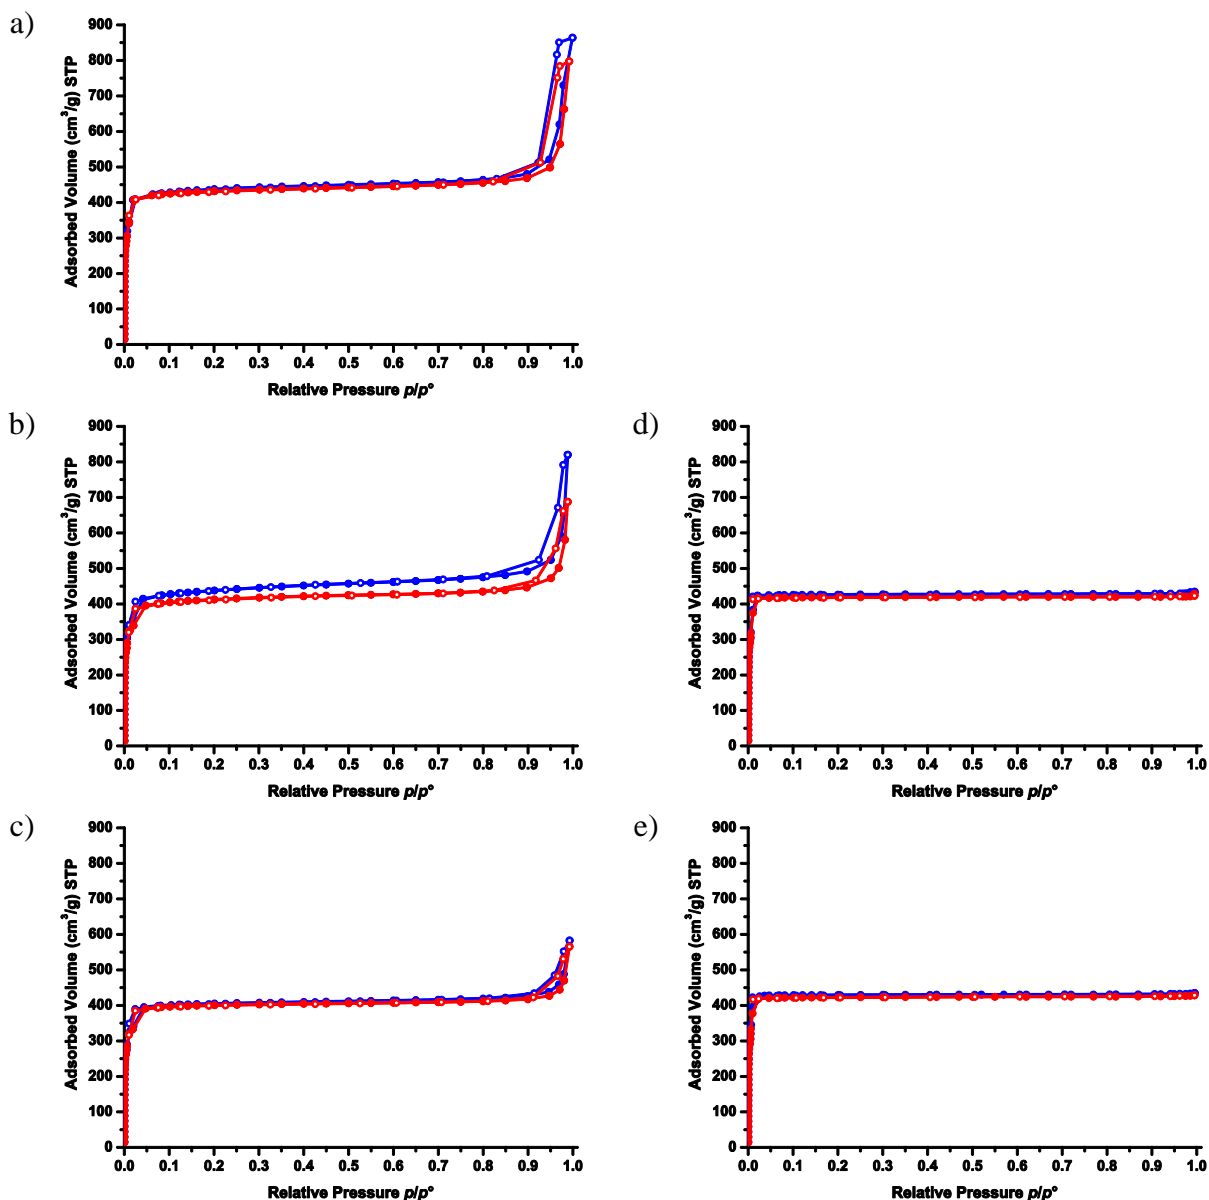

**Fig. S4** N<sub>2</sub> adsorption-desorption isotherms at 77 K before (blue) and after (red) three water intrusion-extrusion cycles of (a) nanometer-sized spherical crystals (NS-ZIF-8 sample), (b) nanometer-sized rhombic dodecahedron crystals (NRD-ZIF-8 sample), (c) nanometer-sized cubic crystals (NC-ZIF-8 sample), (d) micrometer-sized rhombic dodecahedron crystals (MRD-ZIF-8 sample) and (e) micrometer-sized cubic crystals with truncated edges (MCTE-ZIF-8 sample). (Filled symbols: adsorption, open symbols: desorption)

**Table S1** N<sub>2</sub> adsorption-desorption data before and after three intrusion-extrusion cycles of the nanometer-sized spherical crystals (NS-ZIF-8 sample), nanometer-sized rhombic dodecahedron crystals (NRD-ZIF-8 sample), nanometer-sized cubic crystals (NC-ZIF-8 sample), micrometer-sized rhombic dodecahedron crystals (MRD-ZIF-8 sample) and micrometer-sized cubic crystals with truncated edges (MCTE-ZIF-8 sample).

| <b>Samples</b> | <b>Non-intruded samples</b>    |                               |                           | <b>Intruded samples</b>        |                               |                           |
|----------------|--------------------------------|-------------------------------|---------------------------|--------------------------------|-------------------------------|---------------------------|
|                | $V_{\mu}$ (cm <sup>3</sup> /g) | $S_{BET}$ (m <sup>2</sup> /g) | $S_L$ (m <sup>2</sup> /g) | $V_{\mu}$ (cm <sup>3</sup> /g) | $S_{BET}$ (m <sup>2</sup> /g) | $S_L$ (m <sup>2</sup> /g) |
| NS-ZIF-8       | 0.66                           | 1359                          | 1360                      | 0.65                           | 1346                          | 1336                      |
| NRD-ZIF-8      | 0.66                           | 1330                          | 1337                      | 0.64                           | 1265                          | 1273                      |
| NC-ZIF-8       | 0.64                           | 1261                          | 1269                      | 0.64                           | 1246                          | 1253                      |
| MRD-ZIF-8      | 0.66                           | 1390                          | 1374                      | 0.65                           | 1344                          | 1350                      |
| MCTE-ZIF-8     | 0.66                           | 1405                          | 1407                      | 0.65                           | 1360                          | 1366                      |

#### 4.4. Thermogravimetric Analyses

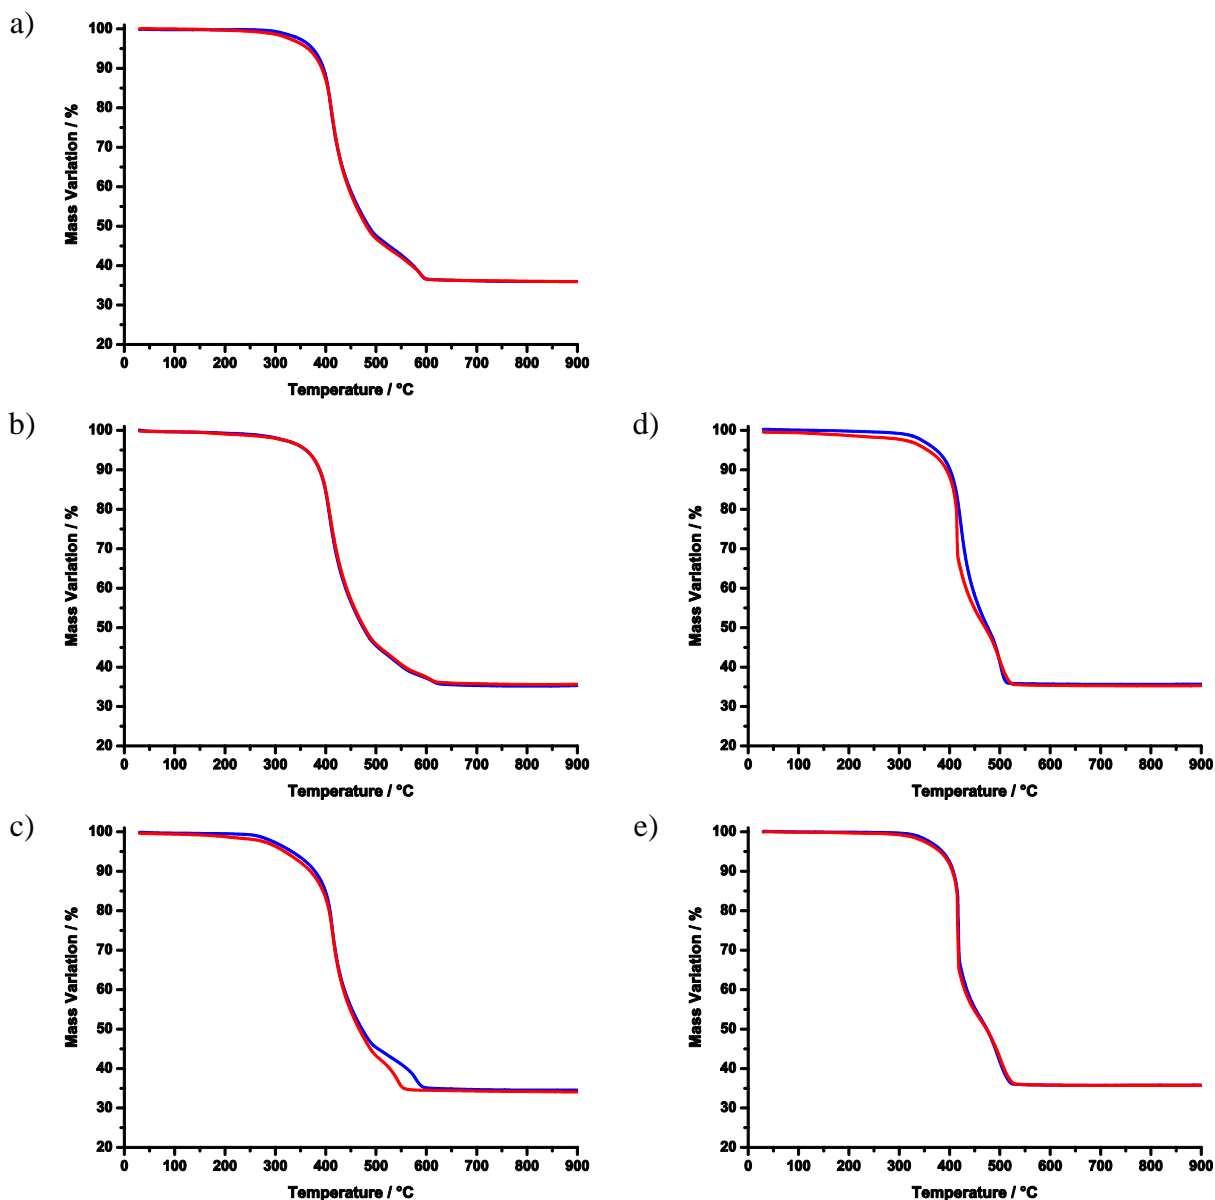

**Fig. S5** TG curves before (blue) and after (red) three water intrusion-extrusion cycles of (a) nanometer-sized spherical crystals (NS-ZIF-8 sample), (b) nanometer-sized rhombic dodecahedron crystals (NRD-ZIF-8 sample), (c) nanometer-sized cubic crystals (NC-ZIF-8 sample), (d) micrometer-sized rhombic dodecahedron crystals (MRD-ZIF-8 sample) and (e) micrometer-sized cubic crystals with truncated edges (MCTE-ZIF-8 sample).

## 5. References

- 1 S. Tanaka, K. Kida, M. Okita, Y. Ito and Y. Miyake, *Chem. Lett.*, 2012, **41**, 1337.
- 2 Z. Li and H. C. Zeng, *Chem. Mater.*, 2013, **25**, 1761.
- 3 Y. Pan, D. Heryadi, F. Zhou, L. Zhao, G. Lestari, H. Su and Z. Lai, *CrystEngComm*, 2011, **13**, 6937.
- 4 M. He, J. Yao, Q. Liu, K. Wang, F. Chen and H. Wang, *Microporous Mesoporous Mater.*, 2014, **184**, 55.
- 5 G. Ortiz, H. Nouali, C. Marichal, G. Chaplais and J. Patarin, *Phys. Chem. Chem. Phys.*, 2013, **15**, 4888.
